# Supplementary material for: Interoceptive awareness and beliefs about health and the body as predictors of the intensity of emotions experienced at the beginning of the pandemic
Source: PeerJ journal article supplement (doi:10.7717/peerj.12542), 2021-12-21
Supplement: MAIA-questionnaire.pdf [file MAIA-questionnaire.pdf]

# Multidimensional Assessment of Interoceptive Awareness (MAIA)

Contact: Wolf E. Mehling, MD  
Osher Center for Integrative Medicine  
University of California, San Francisco  
1545 Divisadero St., 4<sup>th</sup> floor  
San Francisco, CA 94115  
Phone: 01 (415) 353 9506  
[mehlingw@ocim.ucsf.edu](mailto:mehlingw@ocim.ucsf.edu)  
<http://www.osher.ucsf.edu/maia/>



**Below you will find a list of statements. Please indicate how often each statement applies to you generally in daily life.**

|                                                                                                         | Circle one number on each line |   |   |   |   |        |
|---------------------------------------------------------------------------------------------------------|--------------------------------|---|---|---|---|--------|
|                                                                                                         | Never                          |   |   |   |   | Always |
| 1. When I am tense I notice where the tension is located in my body.                                    | 0                              | 1 | 2 | 3 | 4 | 5      |
| 2. I notice when I am uncomfortable in my body.                                                         | 0                              | 1 | 2 | 3 | 4 | 5      |
| 3. I notice where in my body I am comfortable.                                                          | 0                              | 1 | 2 | 3 | 4 | 5      |
| 4. I notice changes in my breathing, such as whether it slows down or speeds up.                        | 0                              | 1 | 2 | 3 | 4 | 5      |
| 5. I do not notice (I ignore) physical tension or discomfort until they become more severe.             | 0                              | 1 | 2 | 3 | 4 | 5      |
| 6. I distract myself from sensations of discomfort.                                                     | 0                              | 1 | 2 | 3 | 4 | 5      |
| 7. When I feel pain or discomfort, I try to power through it.                                           | 0                              | 1 | 2 | 3 | 4 | 5      |
| 8. When I feel physical pain, I become upset.                                                           | 0                              | 1 | 2 | 3 | 4 | 5      |
| 9. I start to worry that something is wrong if I feel any discomfort.                                   | 0                              | 1 | 2 | 3 | 4 | 5      |
| 10. I can notice an unpleasant body sensation without worrying about it.                                | 0                              | 1 | 2 | 3 | 4 | 5      |
| 11. I can pay attention to my breath without being distracted by things happening around me.            | 0                              | 1 | 2 | 3 | 4 | 5      |
| 12. I can maintain awareness of my inner bodily sensations even when there is a lot going on around me. | 0                              | 1 | 2 | 3 | 4 | 5      |
| 13. When I am in conversation with someone, I can pay attention to my posture.                          | 0                              | 1 | 2 | 3 | 4 | 5      |
| 14. I can return awareness to my body if I am distracted.                                               | 0                              | 1 | 2 | 3 | 4 | 5      |
| 15. I can refocus my attention from thinking to sensing my body.                                        | 0                              | 1 | 2 | 3 | 4 | 5      |
| 16. I can maintain awareness of my whole body even when a part of me is in pain or discomfort.          | 0                              | 1 | 2 | 3 | 4 | 5      |

Please indicate how often each statement applies to you generally in daily life.

|                                                                                           | Circle one number on each line |   |   |   |   |        |
|-------------------------------------------------------------------------------------------|--------------------------------|---|---|---|---|--------|
|                                                                                           | Never                          |   |   |   |   | Always |
| 17. I am able to consciously focus on my body as a whole.                                 | 0                              | 1 | 2 | 3 | 4 | 5      |
| 18. I notice how my body changes when I am angry.                                         | 0                              | 1 | 2 | 3 | 4 | 5      |
| 19. When something is wrong in my life I can feel it in my body.                          | 0                              | 1 | 2 | 3 | 4 | 5      |
| 20. I notice that my body feels different after a peaceful experience.                    | 0                              | 1 | 2 | 3 | 4 | 5      |
| 21. I notice that my breathing becomes free and easy when I feel comfortable.             | 0                              | 1 | 2 | 3 | 4 | 5      |
| 22. I notice how my body changes when I feel happy / joyful.                              | 0                              | 1 | 2 | 3 | 4 | 5      |
| 23. When I feel overwhelmed I can find a calm place inside.                               | 0                              | 1 | 2 | 3 | 4 | 5      |
| 24. When I bring awareness to my body I feel a sense of calm.                             | 0                              | 1 | 2 | 3 | 4 | 5      |
| 25. I can use my breath to reduce tension.                                                | 0                              | 1 | 2 | 3 | 4 | 5      |
| 26. When I am caught up in thoughts, I can calm my mind by focusing on my body/breathing. | 0                              | 1 | 2 | 3 | 4 | 5      |
| 27. I listen for information from my body about my emotional state.                       | 0                              | 1 | 2 | 3 | 4 | 5      |
| 28. When I am upset, I take time to explore how my body feels.                            | 0                              | 1 | 2 | 3 | 4 | 5      |
| 29. I listen to my body to inform me about what to do.                                    | 0                              | 1 | 2 | 3 | 4 | 5      |
| 30. I am at home in my body.                                                              | 0                              | 1 | 2 | 3 | 4 | 5      |
| 31. I feel my body is a safe place.                                                       | 0                              | 1 | 2 | 3 | 4 | 5      |
| 32. I trust my body sensations.                                                           | 0                              | 1 | 2 | 3 | 4 | 5      |
